# Supplementary material
Source: PubMed Central journal article supplement (PMC2671989)
Supplement: ddp098_1.pdf [file ddp098_1.pdf]

Supplementary Data

**Supplementary Table 1.** Polymorphisms identified in EvC cohort.

|            | Reported Polymorphisms                                                                                                            | Unreported polymorphisms<br>Sequence<br>Change | Exon           | Protein<br>Effect    |
|------------|-----------------------------------------------------------------------------------------------------------------------------------|------------------------------------------------|----------------|----------------------|
| <i>EVC</i> | rs16837598<br>rs6446393<br>rs6414624<br>rs4688962<br>rs468893<br>rs33929747<br>rs28483498<br>rs2302075<br>rs1383180<br>rs11737221 | G1500A                                         | 11             | M499I                |
| <i>LBN</i> | rs4689278<br>rs730469                                                                                                             | C3505T<br>T2039C<br>C2129T                     | 20<br>14<br>14 | H1169Y<br>R>R<br>H>H |

**Supplementary Table 2:** Primer sequences for *EVC* (5'→3') amplification

| Exon | Forward                  | Reverse                  |
|------|--------------------------|--------------------------|
| 1    | TGCAGCAGGCGGCGGGATGCGGCG | GCCCCGCCGCTGTCTGCTCG     |
| 2    | GACTGGGGGAGTTGACTGGC     | GTCTGCGCATTGACTGTATGTAA  |
| 3    | GAAAGTTTCCCATGCCGTTTGT   | CAATCTCTGGCACATGACGGAAGT |
| 4    | GGCTAGCGTGAATCACTGGTAGA  | TCCTCTGACAATGATGTGACTCCC |
| 5    | GTACTGATGAGGGACGTGCCAATA | ATCTTTCTGCTGAGGCCCTAC    |
| 6    | AGCAAAAGACAAAATACCAT     | TGTAATAAGCTATTTTATACATGA |
| 7    | CCCAGAGCATTAACTATTGTT    | TATTAGGCACACTTCTAACTATCA |
| 8    | ACTGTAGAACGTGATTGTTGCC   | TTAGATTTAAGGATGTCAAGCC   |
| 9    | CCGCTTCCCAGGCAGTGCATTAGT | GGGACCCAGAAGGCCAGTGTTGTG |
| 10   | GGCTCACAGAGTCACCTCCTATGC | ATGAATACCTCCGGCGTCCC     |
| 11   | ACCCTGCATGTTTCTACCAGACTC | GGAGGATGTGAGGTTCTCGCACAC |
| 12   | GTGTCTTGTGGGAGGCTTGTGG   | GAGGCAACAGTCATCTCCGTAGA  |
| 13   | AAGAGAAAATGTTAATGAAATCGG | CTGAGGCTGGAGGGAGCATCA    |
| 14   | CGTGAAGCCAAGAGCATTGACC   | TGGCAAACCTGCTGGAAGCTG    |

|    |                          |                           |
|----|--------------------------|---------------------------|
| 15 | CTTCTCTGTGAGAGGAGCACTTGG | CATGGAGAAGTCAGGCAAAGTCTA  |
| 16 | TTGGTGAGTAGGTGGAAGATCTGA | TGAGACAAAGCACGGGATAAAT    |
| 17 | CCAGACCTGGCACAGTGGATCCT  | CTGACGGCACCCACAGAGAGATATG |
| 18 | CTGCCAGCCTGCCTGCCTTCC    | GCTGGCTTCAGCTATTTCTGCTCC  |
| 19 | TCAGTGGCCAGCCTCAAGTGTC   | TTAGTGGCCAGTGTGGAAGTAGAA  |
| 20 | GCCTCAGTTTCCTCATTAGTTGA  | CACACAGCAGCTGAGTGCATTTAC  |
| 21 | TTAATCCGATTGGGTAAGTTATGG | CCGCTGTCCTCTCCGTCCTC      |

**Supplementary Figure 1.**

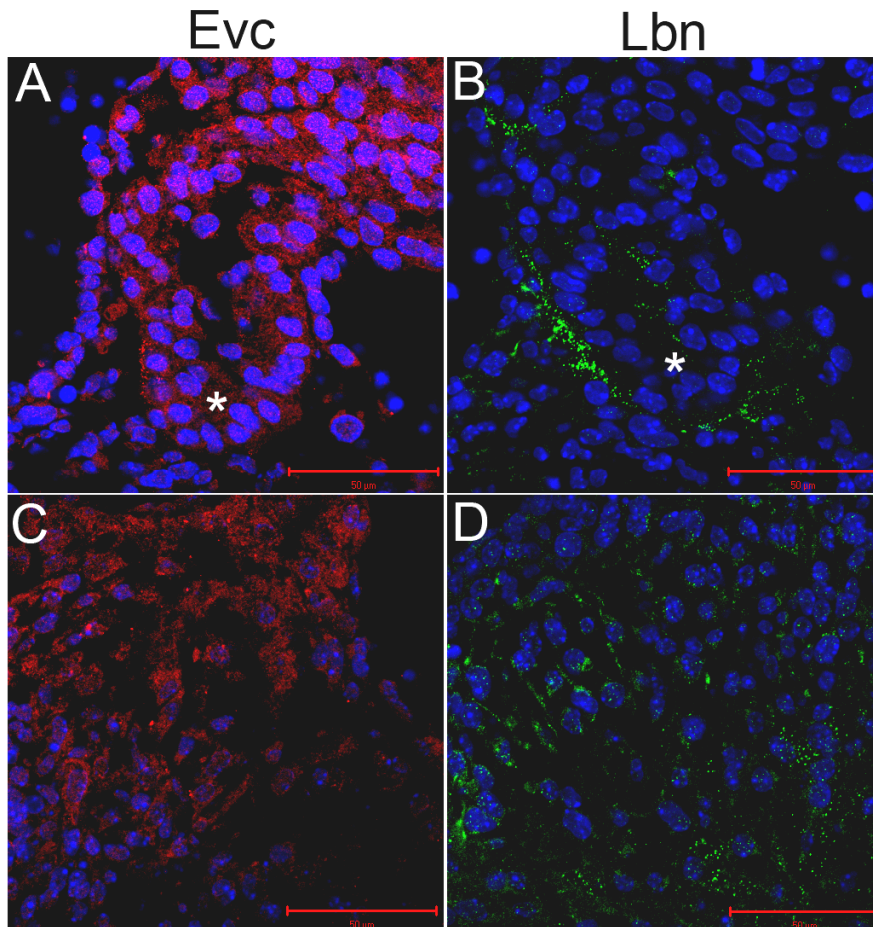

SUPPLEMENTARY FIGURE 1. EVC and LBN are expressed in the same cardiac tissues during development. At 13.5 dpc EVC (red) and LBN (green) are identified in the atrial septum (A, B) and the atrioventricular cushions (C,D). The astericks in A and B indicate the tip of the atrial septum. Scale bars represent 50 μm.

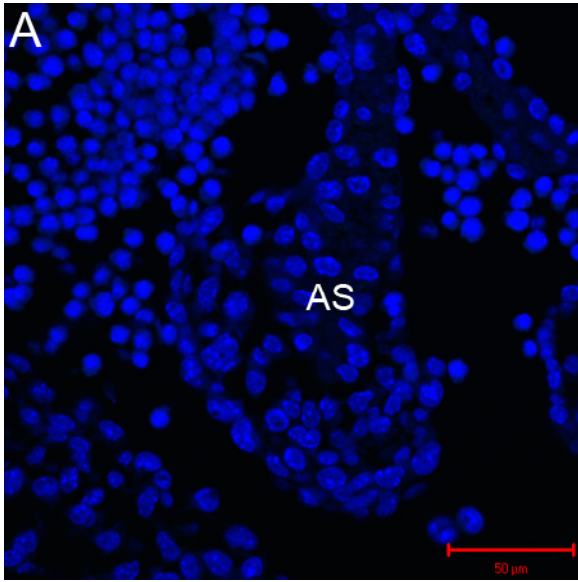

SUPPLEMENTARY FIGURE 2. Negative control for tubulin staining shows staining is not due to secondary antibody (Anti-Mouse 488).
